# Supplementary material for: Migratory culture, population structure and stock identity in North Pacific beluga whales (Delphinapterus leucas)
Source: PLoS One. 2018 Mar 22;13(3):e0194201. doi: 10.1371/journal.pone.0194201 (PMC5863979; doi:10.1371/journal.pone.0194201)
Supplement: S2 Table — The likelihoods of K given the data is reported for 28 separate analyses, each with unique parameter settings. Analyses were run both with and without admixture, with and without sampling location included as prior information, and they contained sample sets of varying size randomly sampled using R (n = 15, 30, 50, 100, and all) that included individuals genotyped at a range of loci (n ≥ 6 loci, n ≥ 7 loci, n = all 8 loci). For each parameter set we used a burn-in period of 50,000 iterations followed by 2x105 iterations to collect data. Multiple runs (n = 5) were conducted for each value of K (n = 8) to ensure convergence for a total of 1,120 separate runs. The most likely K for each analysis is shaded and details on the clustering is provided in the comments. Analyses where K = 6 was well supported are shaded in blue. (XLSX) [file pone.0194201.s007.xlsx]

## Sheet: S2 Table
no of loci with	no. of samples	% missing data			Sample Size					K	Ln prob of data
genotypes	included	average across loci	locus	%	LOC	Code	n	total			Admix	comments	Admix - LOC	comments	No Admix	comments	No Admix - LOC	comments
8 loci	n=15	0	415/416	0	Cook	CK	15	119		1	-3424.4		-3424.1		-3424.3		-3424.5
			417/418	0	Bristol B	BB	15			2	-3716.4		-3380.4		-3584.9		-3372.5
			468/469	0	Norton S	NOR	15			3	-3783.8		-3366.9		-3660.3		-3358.4
			EV37	0	Kotzebue S	KO	15			4	-3953.5		-3340.4	CK,OK, BB, KO-KA-MK.- NOR,AN a mix	-3729.9		-3319.4	CK, OK, BB, KO-KA-MK.- NOR,AN a mix
			EV94	0	Kasegaluk L	KA	15			5	-3696.3		-3338.8	CK,OK, BB. - all the rest really a mix	-3861.3		-3336.8
			D3	0	Mackenzie	MK	15			6	-4287.2		-3368.2		-3814.8		-3414.5
			D5	0	Anadyr	AN	15			7	-4116.8		-3413.5		-3854.3		-3430
			D17	0	Okhotsk	OK	14			8	-3512.1		-3368.2		-3978.6		-3447.6
8 loci	n=30	0	415/416	0	Cook	CK	30	211		1	-6059.8		-6059.8		-6060.2		-6060.4
			417/418	0	Bristol B	BB	30			2	-6040.1	CK-OK, vs the rest	-5948.4		-6019.5	CK-OK, vs the rest	-5947.2
			468/469	0	Norton S	NOR	30			3	-6133.9		-5901		-6150.7		-5965.8
			EV37	0	Kotzebue S	KO	30			4	-6379		-5880.5	CK,OK, BB, KO-KA-MK.-NOR, AN a mix	-6312.7		-5860.8
			EV94	0	Kasegaluk L	KA	30			5	-6699.5		-5880.5	CK, OK, BB, KA, KO-MK.-NOR, AN a mix	-7113.3		-5888.7	CK, OK, BB, KA, NOR-KO-MK ? - AN a mix
			D3	0	Mackenzie	MK	30			6	-6607		-5918.2		-6242.9		-5964.5
			D5	0	Anadyr	AN	17			7	-6287.3		-5936.2		-6265.7		-6062.8
			D17	0	Okhotsk	OK	14			8	-6432.2		-5995.3		-6445.1		-6033.1
≥ 7 loci	n=50	2.9	415/416	7.2	Cook	CK	50	345		1	-9598.9		-9599.4		-9599.6		-9599.4
			417/418	2.3	Bristol B	BB	50			2	-9558.2	CK-OK, vs the rest	-9419.2		-9517.5	CK-OK, vs the rest	-9408.1
			468/469	7.8	Norton S	NOR	50			3	-9646.1		-9353		-9663.2		-9340.5
			EV37	0.9	Kotzebue S	KO	50			4	-10065.9		-9291.1	CK,OK,BB,KO-KA-MK. - NOR,AN a mix	-10012.8		-9303.4	CK,OK-AN,BB,KO-KA-MK. - NOR a mix
			EV94	1.2	Kasegaluk L	KA	50			5	-10476.4		-9376.2		-10335.4		-9358.7
			D3	0.9	Mackenzie	MK	50			6	-10501.3		-9388.6		-10750.1		-9387.3
			D5	0.6	Anadyr	AN	31			7	-10694		-9349.5		-10386.3		-9481.7
			D17	2.3	Okhotsk	OK	14			8	-10868.9		-9489.5		-10523.2		-9507.9
≥ 6 loci	n=100	4.5	415/416	8.9	Cook	CK	78	570		1	-15710.4		-15710.3		-15710.3		-15710.4
			417/418	3.3	Bristol B	BB	100			2	-15632.1		-15427.4		-15566.3		-15424.2
			468/469	13	Norton S	NOR	73			3	-15595.5	CK, BB, vs the rest	-15340.4		-15536.3	CK, BB, vs the rest	-15294.5
			EV37	2.6	Kotzebue S	KO	64			4	-16050.4		-15224.6		-15947.3		-15257.1
			EV94	2.5	Kasegaluk L	KA	100			5	-16294.4		-15171.7	CK, OK, BB, KA, KO-MK. - NOR, AN a mix	-16422.1		-15217.2
			D3	1.4	Mackenzie	MK	96			6	-16867.1		-15296.1		-16882.2		-15171.2	CK, OK, BB, KA, KO-MK, AN. - NOR a mix
			D5	1.8	Anadyr	AN	44			7	-17669.5		-15736		-17870		-15268.6
			D17	2.5	Okhotsk	OK	15			8	-17748.9		-15409.3		-17616.5		-15563.8
≥ 7 loci	all	3.0875	415/416	4.2	Cook	CK	75	947		1	-26436.5		-26436.6		-26436.5		-26436.6
			417/418	2.4	Bristol B	BB	125			2	-26471.6	looks like 2	-26151.7		-26338.3	CK-OK, vs the rest	-26125.6
			468/469	11.2	Norton S	NOR	67			3	-26551.8		-25997.1		-26363.1		-25949.9
			EV37	1.4	Kotzebue S	KO	58			4	-26772.7		-25916.6		-28085.7		-25904.7
			EV94	1.1	Kasegaluk L	KA	485			5	-27480		-25802.7	CK, OK, BB, KA, KO-MK. - NOR, AN a mix	-27713.7		-25831.8	CK,OK-AN,BB,KA, KO-MK. - NOR a mix
			D3	1	Mackenzie	MK	92			6	-28219.7		-26110.7		-28264.1		-25964.1
			D5	0.7	Anadyr	AN	31			7	-28858.2		-26117.9		-30096.4		-25922.2
			D17	2.7	Okhotsk	OK	14			8	-29808.3		-26250.5		-28958.3		-26851.9
8 loci	all	0	415/416	0	Cook	CK	62	714		1	-20510.6		-20510.5		-20510.6		-20510.4
			417/418	0	Bristol B	BB	103			2	-20537.7	hint of 2	-20285.2		-20482.1	CK-OK, vs the rest	-20269.4
			468/469	0	Norton S	NOR	54			3	-20733.3		-20142.1		-20622.1		-20191.2
			EV37	0	Kotzebue S	KO	38			4	-21018.9		-20055.1		-21023.2		-20091
			EV94	0	Kasegaluk L	KA	350			5	-21457.5		-20016.8	CK, OK, BB, KA, KO-MK. - NOR, AN a mix	-21256.9		-20002.8	CK, OK, BB, KA, KO-MK. - NOR, AN a mix
			D3	0	Mackenzie	MK	76			6	-21716.1		-20129.2		-22486.4		-20184.7
			D5	0	Anadyr	AN	17			7	-22629.4		-20228.2		-22646.9		-20389.5
			D17	0	Okhotsk	OK	14			8	-22720.5		-20922.5		-24974.7		-20392.8
≥ 6 loci	all	4.9	415/416	7.5	Cook	CK	78	1032		1	-28296.7		-28296.6		-28296.7		-28296.8
			417/418	4.3	Bristol B	BB	129			2	-28316.9	CK-OK vs the rest	-27985.9		-28218.3	CK-OK, vs the rest	-27972
			468/469	14.6	Norton S	NOR	73			3	-28387.7		-27801.9		-28247		-27780.2
			EV37	2.8	Kotzebue S	KO	64			4	-28643.2		-27676.2		-28480.6		-27713.4
			EV94	2	Kasegaluk L	KA	533			5	-30060.1		-27592	CK, OK, BB, KA, KO-MK. - NOR, AN a mix	-29540.1		-27632.6	CK, OK, BB, KA, KO-MK. - NOR, AN a mix
			D3	1.9	Mackenzie	MK	96			6	-30542.4		-27655.4		-30750.2		-27693.7	CK, OK, BB, KA, KO-MK, AN. - NOR a mix
			D5	1.6	Anadyr	AN	44			7	-30790		-28060.2		-31568		-27792.5
			D17	4.5	Okhotsk	OK	15			8	-31751.7		-28438.6		-31258.8		-28740.6
