# Supplementary material for: Migratory culture, population structure and stock identity in North Pacific beluga whales (Delphinapterus leucas)
Source: PLoS One. 2018 Mar 22;13(3):e0194201. doi: 10.1371/journal.pone.0194201 (PMC5863979; doi:10.1371/journal.pone.0194201)
Supplement: S3 Table — Mantel tests, based on 10,000 permutations were conducted in Arlequin 3.5. (XLSX) [file pone.0194201.s008.xlsx]

## Sheet: S3 Table
	Genetic	season	Differentiation	r	r2	p
	marker		statistic
	mtDNA	summer	Fst	0.1039	0.0107952	0.3507
			Φst	0.2085	0.0434722	0.239
		winter	Fst	0.8957	0.802278	0.0074
			Φst	0.6928	0.479972	0.0236
	nDNA	summer	Fst	0.117	0.013689	0.413
			Rst	0.0015	2.25e-06	0.478
		winter	Fst	0.27502	0.075636	0.257
			Rst	0.5033	0.253311	0.154
